# Supplementary material for: Health Facility Characteristics and Their Relationship to Coverage of PMTCT of HIV Services across Four African Countries: The PEARL Study
Source: PLoS One. 2012 Jan 20;7(1):e29823. doi: 10.1371/journal.pone.0029823 (PMC3262794; doi:10.1371/journal.pone.0029823)
Supplement: Table S1 — (XLSX) [file pone.0029823.s001.xlsx]

## Sheet: Sheet1
TableS1. Development of health facility quality scores, PEARL Facility Survey, 2007-2009
Quality scores	Facilities Items	Patients items	Number of questions	Coding	Score	Scale for analysis
Antenatal	- Health education	Direct observation	31 questions	(1): appropriate care	Max=31	0- 100%
	- Availability of wards		- Facilities (n=17)	(0.5): appropriate care, but data not recorded	Min=0
	- Activity per month		- Patients (n=14)	(0): not appropriate care
	- Availability of Register	- Clinical examination
		- Laboratory test
		- Medication given
		- Tetanus toxin
PMTCT	- Education talk	Direct observation	42 questions	(1): appropriate care	Max=42	0- 100%
	- HIV pre-test counseling		- Facilities (n=35)	(0.5): appropriate care, but data not recorded	Min=0
	- Availability of laboratory		- Patients (n=7)	(0): not appropriate care
	- Staff number trained
	- Place of consultation
	- Reagents and kits available
	- Activity per months
	- HIV test results
	- Location and PMTCT services
	- HIV test and ARV at delivery
	- HIV status in exposed infants
	- Couple counseling
	- Register available	- Blood sample collected
		- Medication given
		- HIV activities
Supplies	- Laboratories supplies	Not applicable	41 questions	(1): yes available	Max=41	0-100%
	- ANC supplies		- Facilities (n=41)	(0): not available	Min=0
	- Neonatal supplies		- Patients (n=0)
	- Neonatal drugs and treatment
	- AND drugs and treatment
	- PMTCT drugs and treatment
	- Child immunization
Staff	- Policies	Not applicable	39 questions	(1): yes available	Max=39	0-100%$
	- Job Aids		- Facilities (n=39)	(0): not available	Min=0
	- Training		- Patients (n=0)
	- Supervision
Quality scores	Facilities Items	Patients items	Number of questions	Coding	Score	Scale for analysis
Patient satisfaction	Not applicable	Exit interview (EI)	16 questions	Strongly agree	Max=5	2011-01-05
			- Facilities (n=39)	Agree	Min=1
			- Patients (n=0)	Uncertain
				Disagree
				Strongly agree
Infrastructure	- Phone or shortwave functional	Not applicable	13 questions	(1): Highest standard	Max=13	0-100%
	- Functional ambulance/vehicle		- Facilities (n=13)	(0.5): average standard	Min=0
	- Electricity on site		- Patients (n=0)	(0): lower level or not existent
	- Generator for electricity
	- Toilet or latrine
	- Water available
	- Soap available
Patient understanding of medication	- Drugs prescribed during ANC visits	Exit interview (EI)	4 questions for maximum six drugs	(0.25): Correct response	Max=1	0-100%
				(0): incorrect response	Min=0
		- Dose
		- Frequency
		- Duration
		- Purpose
Time seen	Time from registration until visits finished.	Direct observation**			**
	(minutes)
Post-test counseling	In women with HIV test results@	Direct observation**			**
Direct Observation: up to six observations in each facility restricted to first antenatal visit
Exit interview: up to six observations in each facility restricted to first antenatal visit
*Two questions were coded 0.5
$ Average of the four sub-domains
** Median of the up of six cases in minutes
@ 7 facilities not included because no women with HIV test results observed
PMTCT: Prevention of mother-to-child transmission of HIV, ARV: antiretroviral drugs, ANC: antenatal care
